# Supplementary material for: Lactobacillus paracasei KW3110 Prevents Blue Light-Induced Inflammation and Degeneration in the Retina
Source: MDPI journal article supplement (doi:10.3390/nu10121991), 2018-12-15

# Light\_CTL

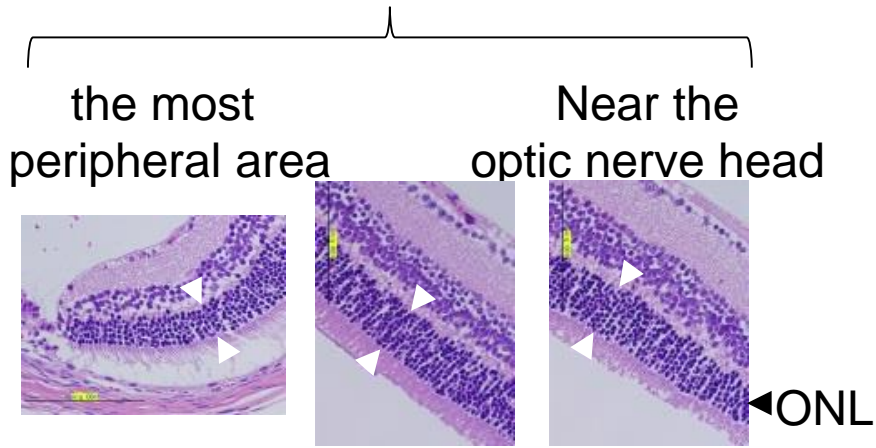

# Light\_KW3110

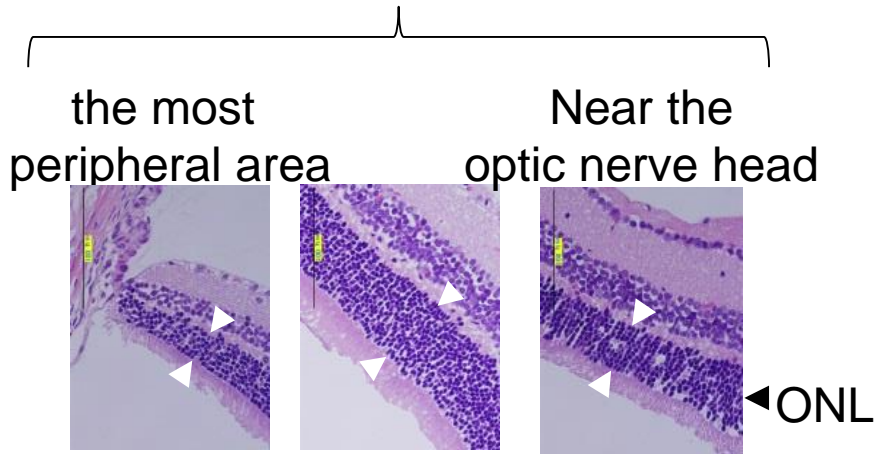

Supplement: s1 [file s1]
